# Supplementary material for: Hydrogen bonds to Au atoms in coordinated gold clusters
Source: PubMed Central journal article supplement (PMC5603579; doi:10.1038/s41467-017-00720-3), 2017-09-18
Supplement: 41467_2017_720_MOESM1_ESM.pdf [file 41467_2017_720_MOESM1_ESM.pdf]

## **Supplementary Methods**

**Materials.** Tetrachloroauric(III) acid tetrahydrate (>47.5% for gold) was obtained from Tanaka Kikinzoku kogyo. Tetrahydrofuran (super-dry, 99.5%), diethyl ether (super-dry, 99.5%), *n*-butyllithium in hexane (1.6 mol/L), methanol (99.5%), ethanol (99.5%), dichloromethane (99%) and diethyl ether (99%) were purchased from Kanto chemicals. 1,3-Dibromobenzene (97%) and potassium hexafluorophosphate (95%) were obtained from TCI. 1,3-Bis(diphenylphosphino)propane (TMDP, 97%) and chlorodiphenylphosphine (99%) were purchased from Aldrich. All the chemicals and reagents were used as received.

**Supplementary Table 1.** Crystal data, data collection and structure refinement for  $1 \cdot (\text{PF}_6)_2 \cdot 4\text{CH}_2\text{Cl}_2$

Empirical formula C124 H104 Au6 Cl8 F12 P10  
Formula weight 3597.17  
Temperature 90 K  
Wavelength 0.71073 Å  
Crystal system monoclinic  
Space group P 1 21/c 1  
Unit cell dimensions  $a = 27.6425(17)$  Å  $\alpha = 90^\circ$   
 $b = 26.6486(16)$  Å  $\beta = 101.2133(8)^\circ$   
 $c = 16.9880(11)$  Å  $\gamma = 90^\circ$   
Volume  $12275.0(13)$  Å<sup>3</sup>  
Z 4  
Density (calculated) 1.946 g/m<sup>3</sup>  
Absorption coefficient 7.516 mm<sup>-1</sup>  
F(000) 6864  
Crystal size 0.42 x 0.30 x 0.18 mm<sup>3</sup>  
Theta range for data collection 1.07 to 26.73°  
Index ranges  $-32 \leq h \leq 34$ ,  $-33 \leq k \leq 33$ ,  $-14 \leq l \leq 21$   
Reflections collected 67149  
Independent reflections 26013 [ $R(\text{int}) = 0.0250$ ]  
Reflections with  $I > 2\sigma(I)$  20774  
Completeness to theta = 26.73° 99.8 %  
Absorption correction Multi scan  
Max. and min. transmission 0.3400 and 0.1900  
Refinement method Full-matrix least-squares on  $F^2$   
Data / restraints / parameters 20774 / 1492 / 1441  
Goodness-of-fit on  $F^2$  1.080  
Final  $R$  indices [ $I > 2\sigma(I)$ ]  $R_1 = 0.0569$ ,  $wR_2 = 0.1377$   
 $R$  indices (all data)  $R_1 = 0.0756$ ,  $wR_2 = 0.1487$   
Largest diff. peak and hole 2.817 and -2.607 eÅ<sup>-3</sup>

**Supplementary Table 2.** Crystal data, data collection and structure refinement for  $2 \cdot (\text{NO}_3)_2 \cdot \text{Et}_2\text{O} \cdot 4\text{H}_2\text{O}$ .

|                                        |                                                                    |                     |
|----------------------------------------|--------------------------------------------------------------------|---------------------|
| Empirical formula                      | C116 H130 Au6 N2 O11 P8                                            |                     |
| Formula weight                         | 3157.78                                                            |                     |
| Temperature                            | 90 K                                                               |                     |
| Wavelength                             | 0.71073 Å                                                          |                     |
| Crystal system                         | Orthorhombic                                                       |                     |
| Space group                            | Pbcn                                                               |                     |
| Unit cell dimensions                   | $a = 25.6660(12)$ Å                                                | $\alpha = 90^\circ$ |
|                                        | $b = 34.0155(16)$ Å                                                | $\beta = 90^\circ$  |
|                                        | $c = 26.7868(13)$ Å                                                | $\gamma = 90^\circ$ |
| Volume                                 | 23386.0(19) Å <sup>3</sup>                                         |                     |
| Z                                      | 8                                                                  |                     |
| Density (calculated)                   | 1.794 g/m <sup>3</sup>                                             |                     |
| Absorption coefficient                 | 7.666 mm <sup>-1</sup>                                             |                     |
| $F(000)$                               | 12176                                                              |                     |
| Crystal size                           | 0.36 x 0.09 x 0.05 mm <sup>3</sup>                                 |                     |
| Theta range for data collection        | 0.99 to 26.02°                                                     |                     |
| Index ranges                           | $-25 \leq h \leq 31$ , $-40 \leq k \leq 41$ , $-33 \leq l \leq 29$ |                     |
| Reflections collected                  | 118118                                                             |                     |
| Independent reflections                | 23036 [ $R(\text{int}) = 0.0250$ ]                                 |                     |
| Reflections with $I > 2\sigma(I)$      | 15284                                                              |                     |
| Completeness to theta = 26.02°         | 100 %                                                              |                     |
| Absorption correction                  | empirical                                                          |                     |
| Max. and min. transmission             | 0.1689 and 0.7005                                                  |                     |
| Refinement method                      | Full-matrix least-squares on $F^2$                                 |                     |
| Data / restraints / parameters         | 23036 / 666 / 1200                                                 |                     |
| Goodness-of-fit on $F^2$               | 1.091                                                              |                     |
| Final $R$ indices [ $I > 2\sigma(I)$ ] | $R_1 = 0.0466$ , $wR_2 = 0.1188$                                   |                     |
| $R$ indices (all data)                 | $R_1 = 0.0952$ , $wR_2 = 0.1506$                                   |                     |
| Largest diff. peak and hole            | 2.958 and -2.397 eÅ <sup>-3</sup>                                  |                     |

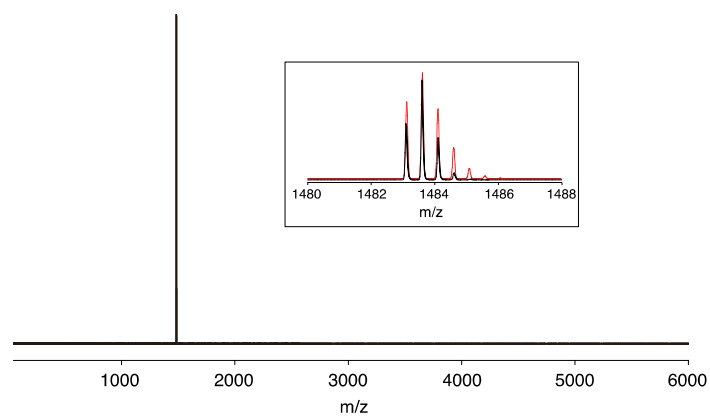

**Supplementary Figure 1.** ESI-MS spectrum of  $1 \cdot (\text{PF}_6)_2$  (Inset) Expanded view (black) superimposed with a simulated spectrum (red).

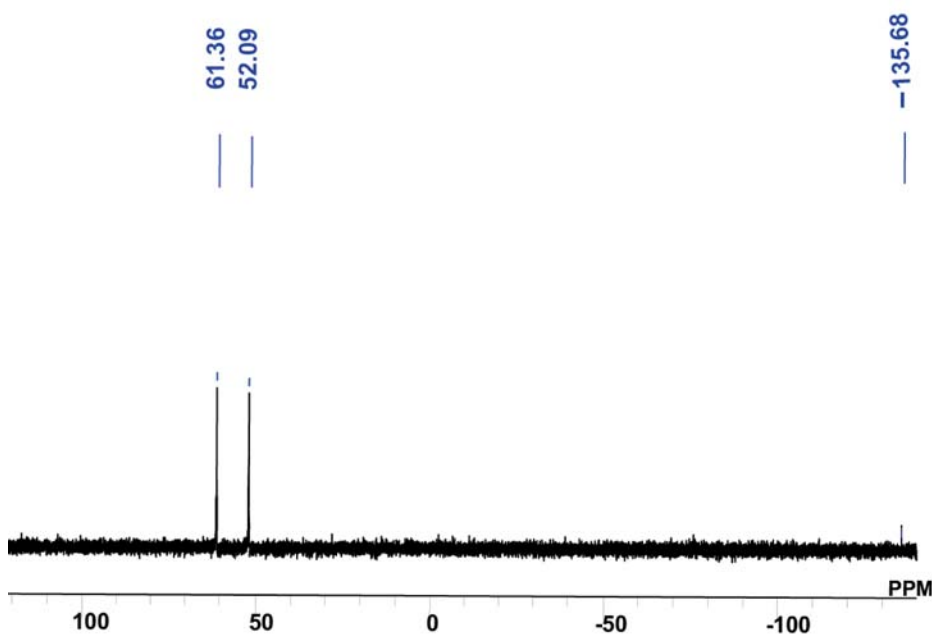

**Supplementary Figure 2.**  $^{31}\text{P}$  NMR spectrum of  $1 \cdot (\text{PF}_6)_2$  in  $\text{CD}_2\text{Cl}_2$  at 25 °C.

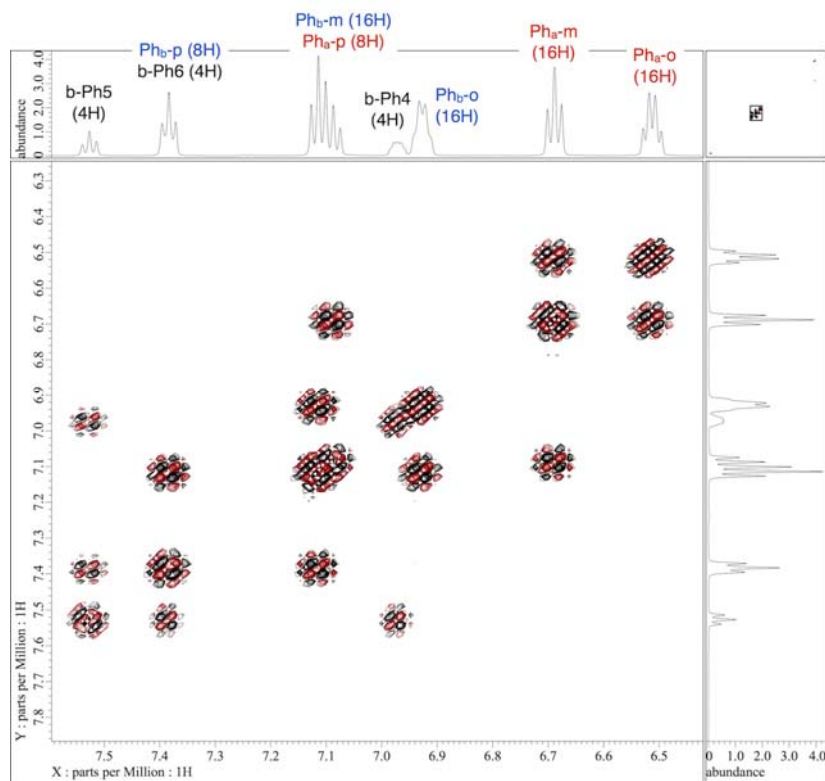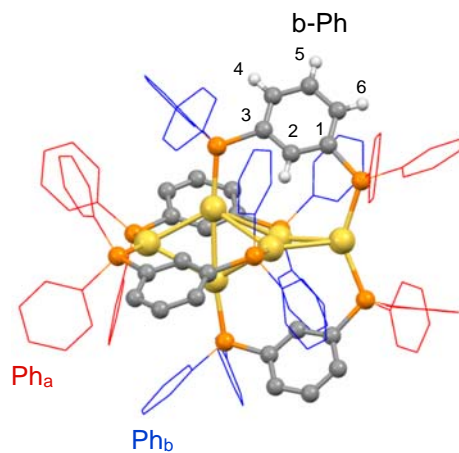

**Supplementary Figure 3.** Aromatic region of  $^1\text{H}$ - $^1\text{H}$  DQF-COSY (600 MHz) spectrum of  $\mathbf{1} \cdot (\text{PF}_6)_2$  in  $\text{CD}_2\text{Cl}_2$  at room temperature ( $\sim 24^\circ\text{C}$ ). Structure of  $\mathbf{1}$  with atom/group labeling is also shown for the peak assignments. The assignments for  $\text{Ph}_a$  /  $\text{Ph}_b$  and b-Ph4 / b-Ph6 in Supplementary Figures 3 – 5 are uncertain.

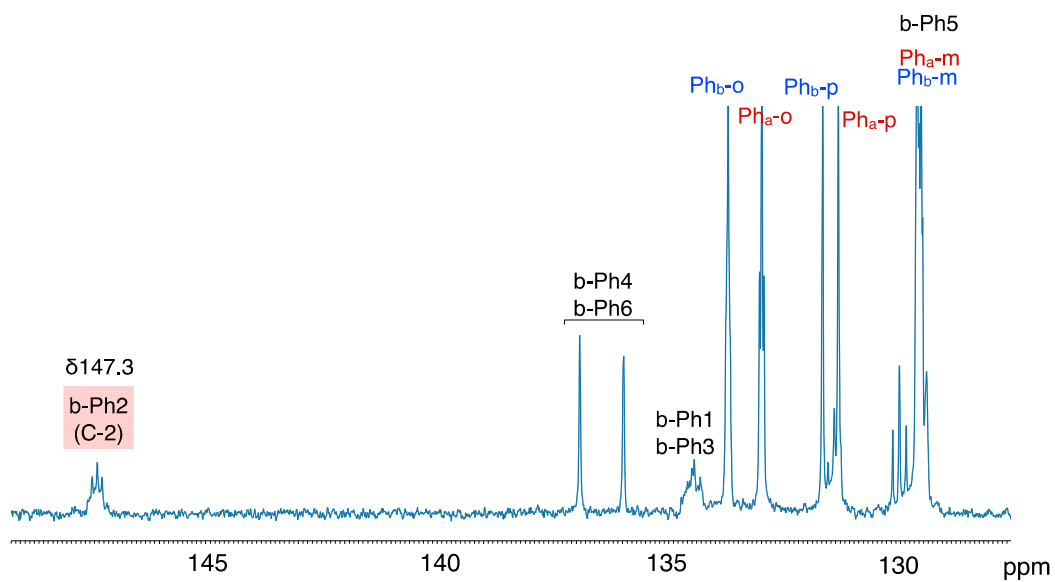

**Supplementary Figure 4.** Aromatic region of  $^{13}\text{C}$  NMR (150 MHz) spectrum of **1**·(PF<sub>6</sub>)<sub>2</sub> in CD<sub>2</sub>Cl<sub>2</sub> at room temperature ( $\sim 24$  °C). For the peak assignments, see the structure of Supplementary Figure 3.

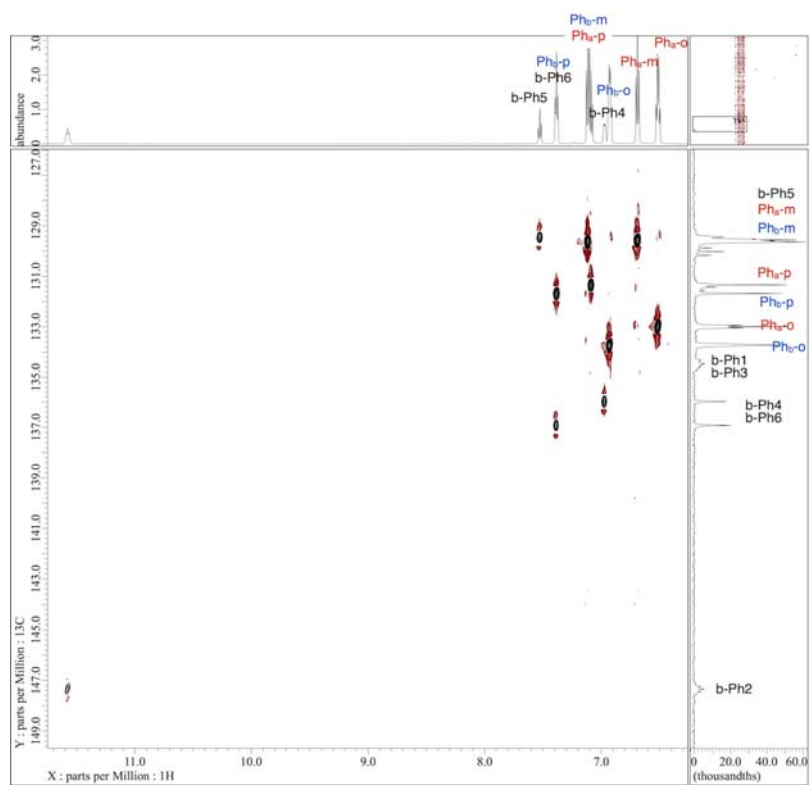

**Supplementary Figure 5.** HSQC (600 MHz) spectrum (aromatic region) of  $1 \cdot (\text{PF}_6)_2$  in  $\text{CD}_2\text{Cl}_2$  at room temperature ( $\sim 24^\circ\text{C}$ ). For the peak assignments, see the structure of Supplementary Figure 3.

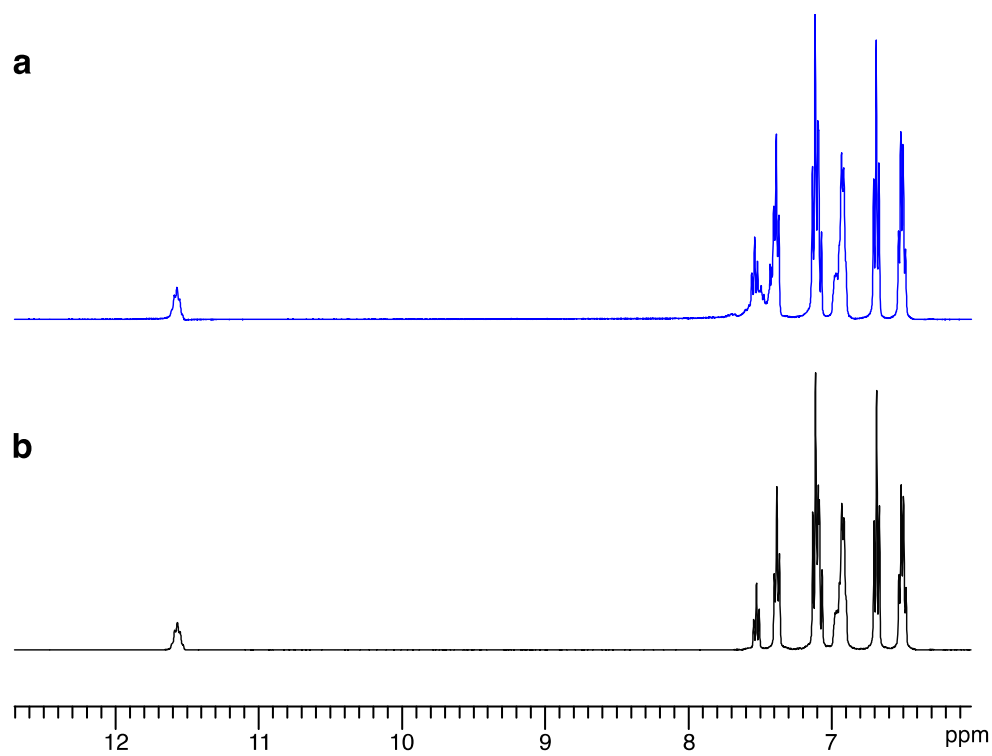

**Supplementary Figure 6.** <sup>1</sup>H-NMR (400 MHz) spectra of **a**)  $\mathbf{1} \cdot (\text{NO}_3)_2$  and **b**)  $\mathbf{1} \cdot (\text{PF}_6)_2$  in  $\text{CD}_2\text{Cl}_2$  at room temperature ( $\sim 24^\circ\text{C}$ ).



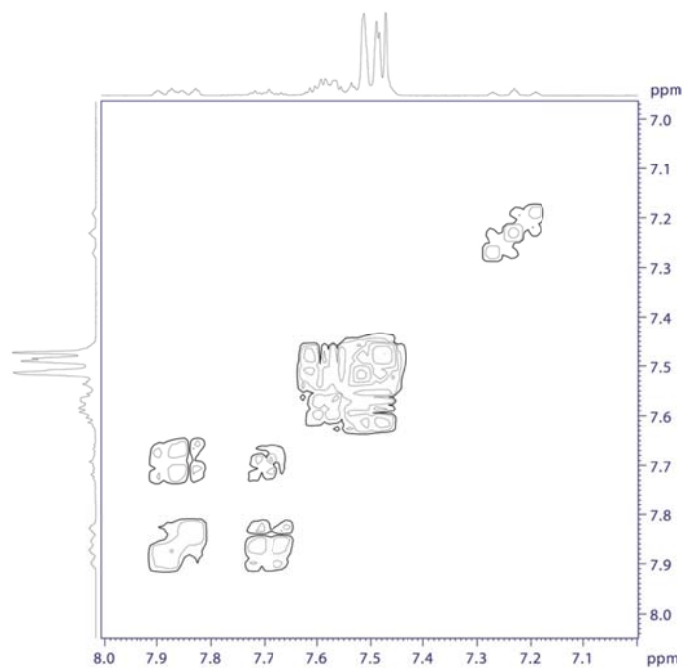

**Supplementary Figure 7.** <sup>1</sup>H-<sup>1</sup>H DQF-COSY (400 MHz) spectrum (aromatic region) of Au<sub>2</sub>(*m*PhDP)<sub>2</sub>Cl<sub>2</sub> (**3**) in CD<sub>2</sub>Cl<sub>2</sub> at room temperature (~ 24 °C).

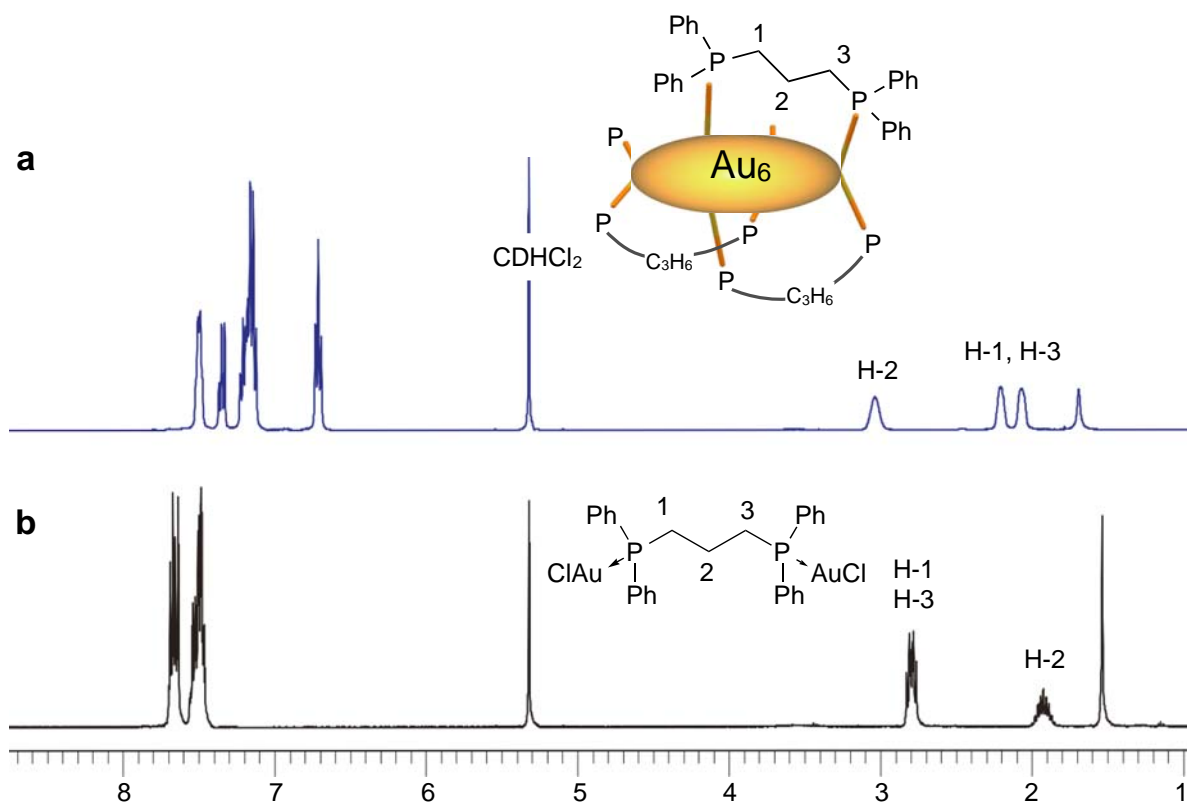

**Supplementary Figure 8.**  $^1\text{H}$  NMR spectra (400 MHz) of **a\mathbf{2} \cdot (\text{NO}\_3)\_2 and **b\mathbf{4} in  $\text{CD}_2\text{Cl}_2$  at  $\sim 24$   $^\circ\text{C}$ .****
